# Supplementary material
Source: PubMed Central journal article supplement (PMC5623180)
Supplement: NIHMS857427-supplement-supp_figure_2.pdf [file NIHMS857427-supplement-supp_figure_2.pdf]

## Supplementary Figure 2.

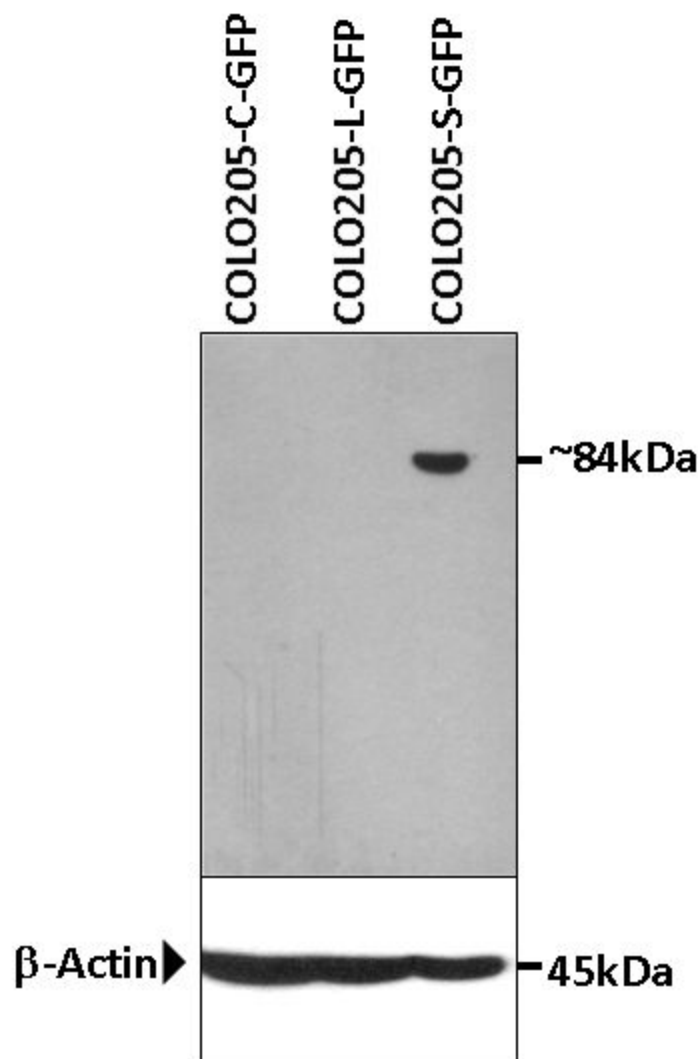

**Supplementary Figure 2. Validation of PS41014-Ab by western blot analysis of COLO205 clones, expressing GFP-tagged DCLK1-L/S isoforms.** The PS41-014-Ab did not detect any band of proteins in the control (COLO205-C-GFP) and L-expressing (COLO205-L-GFP) clones, but detected the 84 KDa S-GFP fusion protein in the COLO205-S-GFP clones, validating the specificity of the antibody generated by us. The corresponding  $\beta$ -actin levels in the cellular lysates of the indicated clones is shown at the bottom of the WB panel.
