# Supplementary material
Source: PubMed Central journal article supplement (PMC5623180)
Supplement: NIHMS857427-supplement-supp_table_1.pdf [file NIHMS857427-supplement-supp_table_1.pdf]

## Supplementary Table 1A

| Patient #     | Lab #    | Age | Sex | Ethnicity | Pathology                 | Experiment           |
|---------------|----------|-----|-----|-----------|---------------------------|----------------------|
| <b>Normal</b> |          |     |     |           |                           |                      |
| 1             | UTMB-356 | 68  | F   | C         | Normal Mucosa             | Fig.1f - Westernblot |
| 2             | UTMB-345 | 59  | F   | AA        | Normal Mucosa             | Fig.1f - Westernblot |
| 3             | UTMB-309 | 70  | M   | W         | Normal Mucosa             | Fig.1f - Westernblot |
| 4             | UTMB-356 | 68  | F   | W         | Normal Mucosa             | Fig.1f - Westernblot |
| <b>AdCa</b>   |          |     |     |           |                           |                      |
| 1             | UAB-5    | 51  | M   | C         | Body wall- AdCA-          | Fig.1f - Westernblot |
| 2             | UAB-6    | 66  | F   | AA        | Left ovary Met-AdCA-Colon | Fig.1f - Westernblot |
| 3             | UAB-10   | 86  | M   | C         | Lung Met-AdCA-Colon       | Fig.1f - Westernblot |
| 4             | UAB13    | 76  | M   | AA        | AdCA colon                | Fig.1f - Westernblot |
| 5             | UAB15    | 55  | M   | C         | AdCA colon                | Fig.1f - Westernblot |

## Supplementary Table 1B

| Patient #      | Lab #    | Age | Sex | Ethnicity | Pathology     | Experiment         |
|----------------|----------|-----|-----|-----------|---------------|--------------------|
| <b>Normal</b>  |          |     |     |           |               |                    |
| 1              | UTMB-215 | 63  | F   | C         | Normal Mucosa | Figure 2 and 3 IHC |
| 2              | UTMB-205 | 72  | F   | AA        | Normal Mucosa | Figure 2 and 3 IHC |
| 3              | UTMB-212 | 78  | M   | AA        | Normal Mucosa | Figure 2 and 3 IHC |
| 4              | UTMB-232 | 52  | M   | H         | Normal Mucosa | Figure 2 and 3 IHC |
| 5              | UTMB-113 | 76  | M   | C         | Normal Mucosa | Figure 2 and 3 IHC |
| 6              | UTMB-184 | 54  | M   | H         | Normal Mucosa | Figure 2 and 3 IHC |
| <b>Adenoma</b> |          |     |     |           |               |                    |
| 1              | UTMB-49  | 64  | F   | AA        | TA            | Figure 2 and 3 IHC |
| 2              | UTMB-60  | 52  | M   | C         | TA            | Figure 2 and 3 IHC |
| 3              | UTMB-61  | 65  | F   | C         | TA            | Figure 2 and 3 IHC |
| 4              | UTMB-66  | 73  | M   | C         | TA            | Figure 2 and 3 IHC |
| 5              | UTMB-87  | 59  | F   | C         | TA            | Figure 2 and 3 IHC |
| 6              | UTMB-233 | 64  | F   | C         | TA            | Figure 2 and 3 IHC |
| 7              | UTMB-222 | 50  | M   | C         | TA            | Figure 2 and 3 IHC |
| 8              | UTMB-235 | 67  | M   | C         | TA            | Figure 2 and 3 IHC |
| 9              | UTMB-236 | 52  | M   | C         | TA            | Figure 2 and 3 IHC |
| 10             | UTMB-262 | 60  | M   | AA        | TA            | Figure 2 and 3 IHC |
| 11             | Utmb-235 | 67  | M   | C         | TA            | Figure 2 and 3 IHC |
| <b>AdCa</b>    |          |     |     |           |               |                    |
| 1              | UAB-21   | 76  | M   | AA        | AdCA Colon    | Figure 2 and 3 IHC |
| 2              | UAB-22   | 55  | M   | W         | AdCA Colon    | Figure 2 and 3 IHC |
| 3              | UAB23    | 58  | F   | W         | AdCA Colon    | Figure 2 and 3 IHC |
| 4              | UAB-24   | 73  | F   | W         | AdCA Colon    | Figure 2 and 3 IHC |
| 5              | UTMB-74  | 49  | M   | AA        | AdCA Colon    | Figure 2 and 3 IHC |
| 6              | UTMB-89  | 80  | F   | AA        | AdCA Colon    | Figure 2 and 3 IHC |
| 7              | UTMB-91  | 78  | F   | C         | AdCA Colon    | Figure 2 and 3 IHC |
| 8              | UTMB114  | 58  | M   | H         | AdCA Colon    | Figure 2 and 3 IHC |
| 9              | UTMB-126 | 58  | M   | H         | AdCA Colon    | Figure 2 and 3 IHC |
| 10             | UTMB-176 | 76  | M   | C         | AdCA Colon    | Figure 2 and 3 IHC |
| 11             | UTMB-128 | 76  | M   | C         | AdCA Colon    | Figure 2 and 3 IHC |
