# Supplementary material
Source: PubMed Central journal article supplement (PMC5623180)
Supplement: NIHMS857427-supplement-supp_table_2.pdf [file NIHMS857427-supplement-supp_table_2.pdf]

**Supplementary Table II**

|          | Methods              | Concentration of PS41014 Used (ng/ml) |
|----------|----------------------|---------------------------------------|
| <b>1</b> | Western Blot         | <b>0.5</b>                            |
| <b>2</b> | Immunohistochemistry | <b>1.25</b>                           |
| <b>3</b> | Immuno-precipitation | <b>2500.0</b>                         |
| <b>4</b> | Electron microscopy  | <b>12.5</b>                           |
