# Supplementary material
Source: PubMed Central journal article supplement (PMC5623180)
Supplement: NIHMS857427-supplement-supp_table_3a.pdf [file NIHMS857427-supplement-supp_table_3a.pdf]

SupplementaryTable III A

| Low-Risk |     |     |           |                        |                     |                              |
|----------|-----|-----|-----------|------------------------|---------------------|------------------------------|
| Patient  | Sex | Age | Ethnicity | Colonoscopy            |                     |                              |
|          |     |     |           | 1st                    | 2nd                 | 3rd                          |
| UTMB 246 | F   | 75  | W         | 2001                   | 2003                | 2006                         |
|          |     |     |           | TVA (1)<br>(8mm)       | Hp (1) (1mm)        | Hp (2) (n/a)<br>TA (1) (n/a) |
|          |     |     |           |                        |                     |                              |
| UTMB 247 | F   | 60  | W         | 2000                   | 2013                | 2014                         |
|          |     |     |           | Hp (2) (n/a)           | TA (3) (4-<br>14mm) | TA (1) (n/a)<br>Hp (1) (n/a) |
|          |     |     |           |                        |                     |                              |
| UTMB 248 | F   | 84  | W         | 2000                   | 2004                | 2007                         |
|          |     |     |           | TA (3) (6-<br>8mm)     | Hp (1) (5mm)        | Hp (1) (n/a)                 |
|          |     |     |           | Hp (5) (5-<br>10mm)    |                     |                              |
| UTMB 249 | M   | 79  | H         | 2000                   | 2001                | 2004                         |
|          |     |     |           | TA (1) (n/a)           | TA (1) (n/a)        | TA (2) (n/a)                 |
|          |     |     |           | TVA (1) (n/a)          |                     | Hp (1) (n/a)                 |
|          |     |     |           | Hp (1) (n/a)           |                     |                              |
| UTMB 250 | M   | 72  | W         | 2004                   | 2010                |                              |
|          |     |     |           | Hp (1) (n/a)           | TA (2) (5mm)        |                              |
| UTMB 251 | M   | 79  | W         | 2000                   | 2013                |                              |
|          |     |     |           | TA (2) (2-<br>3mm)     | TA (1)<br>(10mm)    |                              |
| UTMB 252 | F   | 75  | W         | 2000                   | 2001                | 2003                         |
|          |     |     |           | TA (2) (n/a)           | Hp (1) (5mm)        | TVA (1) (15mm)               |
|          |     |     |           | TVA (1) (7.5-<br>15mm) | TA (1) (5mm)        |                              |
| UTMB 253 | F   | 65  | W         | 2000                   | 2004                | 2007                         |
|          |     |     |           | TA (1) (5mm)           | Hp (1) (n/a)        | Hp (1) (n/a)                 |
|          |     |     |           | Hp (2) (7-<br>10mm)    |                     | TA (1) (n/a)                 |
