# Supplementary material
Source: PubMed Central journal article supplement (PMC5623180)
Supplement: NIHMS857427-supplement-supp_table_3b.pdf [file NIHMS857427-supplement-supp_table_3b.pdf]

**SupplementaryTable III B**

|                |            |            |                  | <b>High-Risk</b>   |                                 |                                                      |
|----------------|------------|------------|------------------|--------------------|---------------------------------|------------------------------------------------------|
| <b>Patient</b> | <b>Sex</b> | <b>Age</b> | <b>Ethnicity</b> | <b>Colonoscopy</b> |                                 |                                                      |
|                |            |            |                  | <b>1st</b>         | <b>2nd</b>                      | <b>3rd</b>                                           |
| UTMB 254       | M          | 71         | W                | 2006               | 2015                            | 2016                                                 |
|                |            |            |                  | TA (2) (n/a)       | TA (4) (4-12mm)                 | AdCA (1) (n/a)                                       |
|                |            |            |                  |                    | TVA (1) (5-6mm)                 | TVA (3) (n/a)                                        |
|                |            |            |                  |                    | Mass Not removed<br>(2) (30+mm) |                                                      |
| UTMB 255       | M          | 86         | W                | 2004               | 2006                            | 2015                                                 |
|                |            |            |                  | TA (1) (30mm)      | Hp (1) (n/a)                    | Inflammation<br>and Mass<br>(Not removed)<br>(>50mm) |
|                |            |            |                  | TA (1) (n/a)       | TA (2) (n/a)                    |                                                      |
| UTMB 256       | F          | 63         | AA               | 2004               | 2010                            | 2012                                                 |
|                |            |            |                  | Hp (1) (n/a)       | TA (3) (4-20mm)                 | Hp (1) (8.5mm)                                       |
|                |            |            |                  |                    | SSA (1) (25mm)                  | TA (2) (4.5-7mm)                                     |
|                |            |            |                  |                    | Hp (1) (n/a)                    |                                                      |
| UTMB 257       | M          | 68         | W                | 2005               | 2012                            | 2013                                                 |
|                |            |            |                  | TA (1) (n/a)       | TA (3) (n/a)                    | AdCA (1) (n/a)                                       |
|                |            |            |                  | Hp (2) (n/a)       | Hp (3) (n/a)                    |                                                      |
| UTMB 258       | M          | 79         | W                | 2005               | 2008                            | 2012                                                 |
|                |            |            |                  | Hp (1) (n/a)       | TVA (1) (n/a)                   | AdCA (1) (n/a)                                       |
| UTMB 259       | M          | 68         | H                | 2008               | 2012                            | 2013                                                 |
|                |            |            |                  | TA (2) (3-6mm)     | TA (1) (>30mm)                  | AdCA (2) (n/a)                                       |
|                |            |            |                  |                    |                                 | TA (1) (n/a)                                         |
